# Supplementary material
Source: ML conference proceedings conference paper supplement (https://www.ecva.net/papers/eccv_2022/papers_ECCV/html/136750214_ECCV_2022_paper.php)
Supplement: Supplementary file 1 [file 136750214-supp.pdf]

# L-Tracing: Fast Light Visibility Estimation on Neural Surfaces by Sphere Tracing

Ziyu Chen<sup>1†</sup>, Chenjing Ding<sup>2,3</sup>, Jianfei Guo<sup>3</sup>, Dongliang Wang<sup>2,3</sup>,  
Yikang Li<sup>2,3</sup>, Xuan Xiao<sup>4</sup>, Wei Wu<sup>2,3</sup>, and Li Song<sup>1‡</sup>

<sup>1</sup> Department of Electronic Engineering, Shanghai Jiao Tong University

<sup>2</sup> SenseTime Research, {dingchenjing,wangdongliang,wuwei}@senseauto.com

<sup>3</sup> Shanghai AI Laboratory, {guojianfei,liyikang}@pjlab.org.cn

<sup>4</sup> Department of Mechanical Engineering, Tsinghua University  
x-xiao20@mails.tsinghua.edu.cn

## 1 Additional Proof

In this section, we prove the linear convergence of L-Tracing. As shown in Fig. 3 of the main body, the signed distance of the  $k_{th}$  tracing point  $\mathbf{O}_k$  is  $f_k$ , the signed distance between  $\mathbf{O}_k$  and the surface point is  $\mathbf{Q}$  is  $\epsilon_k$ , according to the definition of the signed distance, we know  $|f_k| \leq |\epsilon_k|$ , besides,  $f_k$  and  $\epsilon_k$  have the same sign. If the ray is encountered with a convex surface, we have  $|f_k| \geq |\epsilon_k \sin \theta|$ , if the surface is concave, we have  $|f_k| \geq |\epsilon_k \sin \alpha|$ . Since our tracing point always starts from outside of the surface, we have  $\epsilon_0 > 0$ . Thus we formulate our problem as follows:

For a series  $\epsilon_k$ , where  $k \in \mathbb{N}$ , the equation  $\epsilon_{k+1} = \epsilon_k - f_k$  is satisfied, besides,  $|\epsilon_k| \geq |f_k| \geq |\epsilon_k \sin \phi|$ ,  $\phi$  equals to  $\theta$  for the convex surface and  $\alpha$  for the concave surface,  $\phi \in (0, 90^\circ]$ , if  $\epsilon_0 > 0$ ,  $f_k$  and  $\epsilon_k$  have the same sign. Prove: the series  $\epsilon_k$  converges to 0 linearly.

Firstly, we prove series  $\epsilon_k$  is convergent by applying mathematical induction, when  $k = 0$ , we have:

$$\epsilon_0 > 0 \quad (1)$$

If  $\epsilon_k > 0$ , we have  $\epsilon_k \geq f_k > 0$ , thus:

$$\epsilon_{k+1} = \epsilon_k - f_k \geq 0 \quad (2)$$

According to mathematical induction, we derive that: for  $\forall k \in \mathbb{N}$ ,  $\epsilon_k \geq 0$  is satisfied. Since  $f_k$  have the same sign with  $\epsilon_k$ , for  $\forall k \in \mathbb{N}$ ,  $f_k \geq 0$  is satisfied, thus:

$$\epsilon_{k+1} - \epsilon_k = -f_k \leq 0 \quad (3)$$

From Eqn. 3, we know  $\epsilon_k$  is a monotonic decreasing series, according to monotone convergence theorem, series  $\epsilon_k$  is convergent.

<sup>†</sup> The work is done when Ziyu Chen <ziyu.sjtu@gmail.com> is an intern at SenseTime.

<sup>‡</sup> Corresponding author: Li Song. <song\_li@sjtu.edu.cn>

Secondly, we prove series  $\epsilon_k$  converges to 0. Since  $f_k \geq 0$  and  $\epsilon_k \sin \phi \geq 0$ , we get  $f_k \geq \epsilon_k \sin \phi$ , as:

$$0 \leq \epsilon_{k+1} = \epsilon_k - f_k \leq \epsilon_k(1 - \sin \phi) \quad (4)$$

from Eqn. 4 we get:

$$0 \leq \epsilon_n \leq (1 - \sin \phi)^n \epsilon_0 \quad (5)$$

for  $\forall q > 0$ , we find:

$$N = \lceil \frac{\log(\frac{q}{\epsilon_0})}{\log(1 - \sin \phi)} \rceil, \quad N \in \mathbb{N} \quad (6)$$

when  $n > N$ , we get:

$$|\epsilon_n - 0| \leq (1 - \sin \phi)^n \epsilon_0 < q \quad (7)$$

Thus the series  $\epsilon_k$  converges to 0. Thirdly, we prove that the convergence is in a linear speed, the limitation is described as:

$$\lim_{k \rightarrow \infty} \frac{|\epsilon_{k+1} - 0|}{|\epsilon_k - 0|} = \frac{|\epsilon_k - f_k|}{|\epsilon_k|} \quad (8)$$

since  $0 \leq f_k \leq \epsilon_k$ , we get:

$$\lim_{k \rightarrow \infty} \frac{|\epsilon_{k+1} - 0|}{|\epsilon_k - 0|} = 1 - \frac{f_k}{\epsilon_k} \quad (9)$$

as  $k \rightarrow \infty$ , we have:  $\epsilon_k \rightarrow 0$  and  $f_k \rightarrow 0$ , the local surface is regarded as a plane if  $k$  reaches the limitation. Since  $\phi$  is the angle between the surface and the ray, we get:

$$\lim_{k \rightarrow \infty} \frac{\epsilon_{k+1}}{\epsilon_k} = 1 - \sin \phi < 1 \quad (10)$$

Now we complete the proof, the series  $\epsilon_k$  converges to 0 linearly.

## 2 Ablation Study

In Fig. 2, we visualize the light visibility estimated by L-Tracing in different iterations(20, 40, 80). Similar to Section 5.1 of the main body, we visualize the “mean” light visibility of the observed object’s surface to show the average intensity of the light reaching the surface, we also list the light visibility under the single point light with no ambient illumination(OLAT). Results show that the light visibility images estimated under different tracing iterations are close to each other, except for slight differences that we visualize in Fig. 1. Since these differences induce a small drop in the overall quality of estimated light visibility and recovered surface material properties, we set the L-Tracing iterations to 20 when comparing with related approaches.

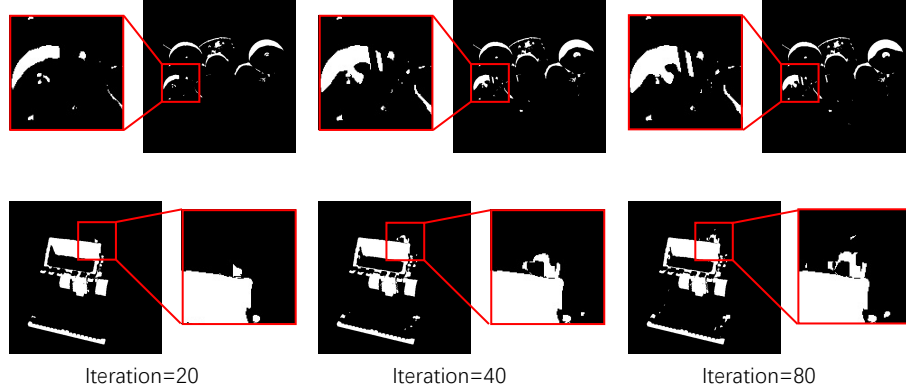

**Fig. 1. Details of Light Visibility.** We select one region on the light visibility images of “Drums OLAT2” and “Lego OLAT2”. Although the light visibility estimated in 20 iterations losses some subtle details compared to those from 40 and 80 iterations, it has very little impact on the performance of our framework.

### 3 Implementation details

Our framework is implemented in PyTorch [5], there are two training stages in our framework: stage one is the training of neural implicit surfaces, we optimize the MLPs that model the signed distance function and spatial color. In stage two, we do reflectance and illumination decomposition on the trained neural surface with L-Tracing as the light visibility estimation method, we optimize the Albedo MLP and Material Latent MLP. The BRDF MLP is pre-trained on MERL dataset [2] and fixed during stage two.

#### 3.1 Network Architecture

For stage one, we refer to [6] for network architecture designing, the neural surface MLP  $f$  that models the SDF consists of 8 layers with the layer size of 256, we use a skip connection that connects the input and the fourth layer’s output. The positional encoding frequency of the input coordinates is 8. For stage two, all introduced MLPs contain 4 layers with layer size of 128, a skip connection connects the input to the third layer. Similar to [7], the final output is activated by the Sigmoid function in Albedo MLP, and the Softplus( $\beta=1$ ) function in Material Latent MLP. The encoding frequency for the spatial location is 10 in Albedo MLP and Material Latent MLP. According to [4, 7], we constrain the albedo to range  $[0.03, 0.8]$ , making it useful for learning reflectance. Our environment illumination is in the resolution of  $16 \times 32$ , each light source includes 3 parameters learning the RGB channels, thus the illumination is modeled by trainable parameters with the tensor size of  $512 \times 3$ .

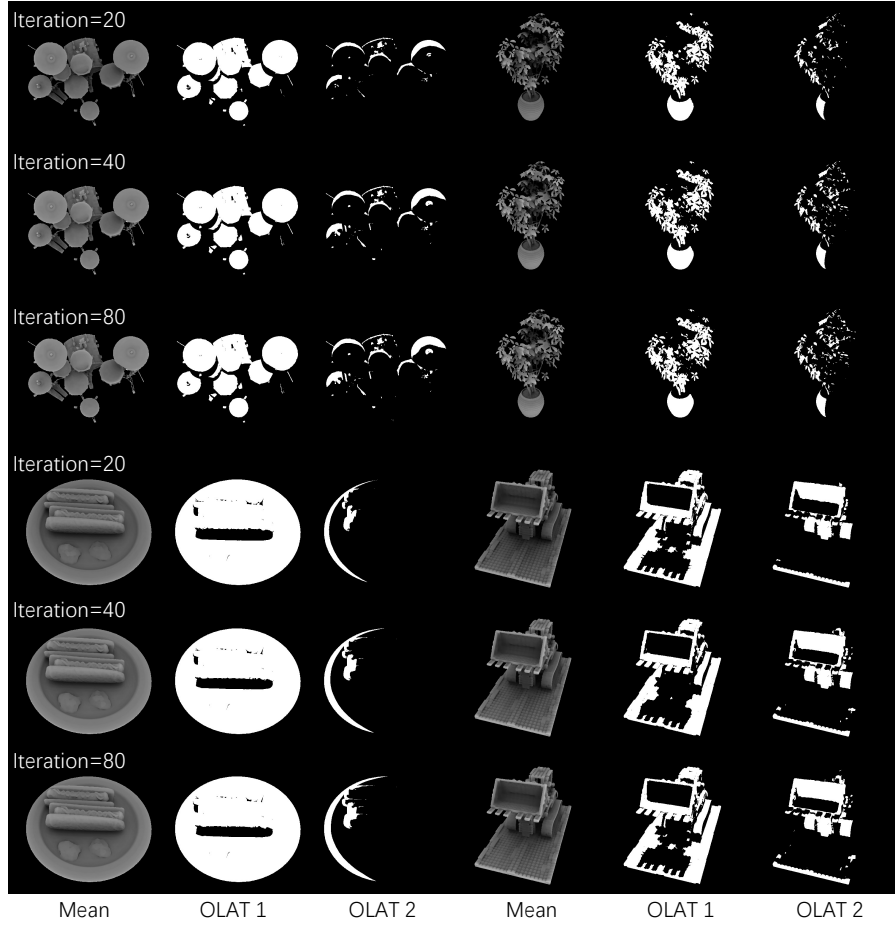

**Fig. 2. Visual Results of Ablation Study.** We visualize the light visibility estimated by L-Tracing in different tracing iterations. The light visibility images estimated in 20 iterations are close to those in 40 and 80 iterations, indicating that it rarely needs 80 iterations to compute accurate light visibility.

### 3.2 Training Details

In both stages, the resolution of the training images is  $512 \times 512$ . For shape reconstruction, we sample a batch of rays with the batch size of 1024 in each iteration, the model is optimized for 150k iterations, we linearly warm up the learning rate from 0 to  $5 \times 10^{-4}$  in the first 5k iterations, then use cosine decay scheduler controlling it to  $5 \times 10^{-5}$  in the rest iterations. For reflectance factorization, the training iterations is 5k and the batch size of the sampled rays is 2048. The learning rate is  $5 \times 10^{-3}$  during all iterations. L-Tracing is applied for light visibility estimation in stage two, we set the tracing iterations to 20. We test our framework on one Nvidia GeForce RTX 3090, it takes 8 hours for the training of shape reconstruction and takes only 20-30 minutes for the training of reflectance factorization.

## 4 Additional Results

In Tab. 1, we report the metrics on novel view synthesis quality for the four scenes in NeRFactor’s synthetic dataset. We also report the albedo estimation quality in Tab. 2 and the HDR relighting image quality in Tab. 3 for the same scenes. Each scene of the four scenes includes 8 validation views, among them each view includes one ground truth albedo and 8 ground truth HDR relighting images. The additional visualization of estimated light visibility of “Hotdog” and “Lego” is shown in Fig. 4. We visualize the recovered albedo of “Hotdog” and “Lego” in Fig. 3, and visualize the relighting images of “Drums” and “Ficus” in Fig. 5. As for real-world datasets, we did experiments on DTU MVS datasets [1] and real scene pinecone(captured by authors of [3]) , the results are shown in Fig. 6.

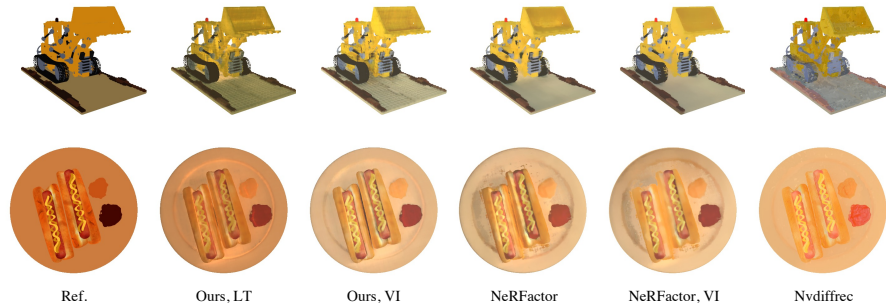

**Fig. 3. Albedo Recovery.** We visualize the recovered albedo of “Lego” and “Hotdog”. The albedo from ours and NeRFactor are rescaled to eliminate the scale ambiguity. The results of Nvdiffric are provided by Nvdiffric’s [4] authors.

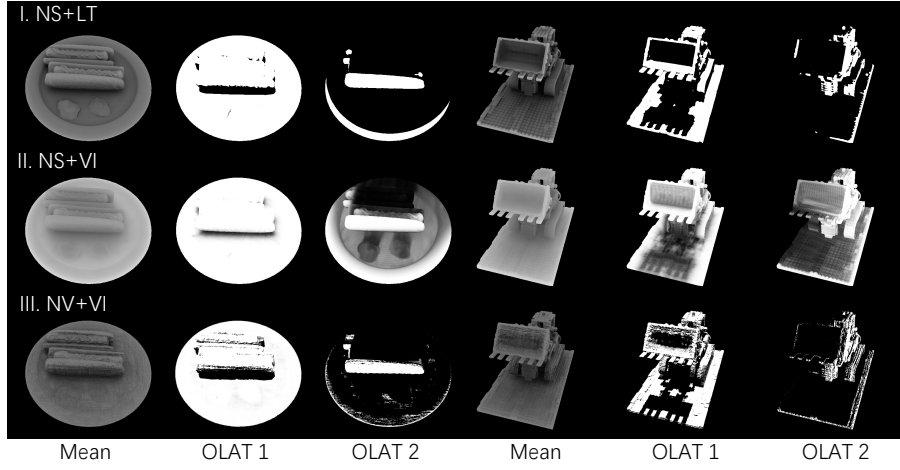

**Fig. 4. Light Visibility Visualization.** The light visibility is estimated on the NeRFactor synthetic dataset. The color denotes the lighting intensity on the surface. “Mean” denotes the mean light visibility across all light sources, while “OLAT1” and “OLAT2” denotes the light visibility under two different single light source points.

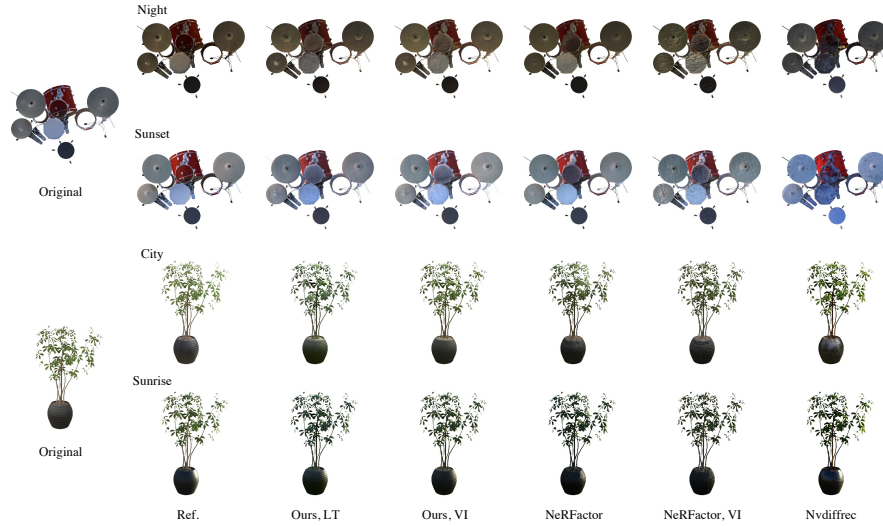

**Fig. 5. Novel View Relighting.** We visualize the relighting results of “Drums” and “Ficus”. The images are produced by rendering the learned surface and reflectance with novel HDR light probes. The results of Nvdiffrac are provided by Nvdiffrac’s [4] authors.

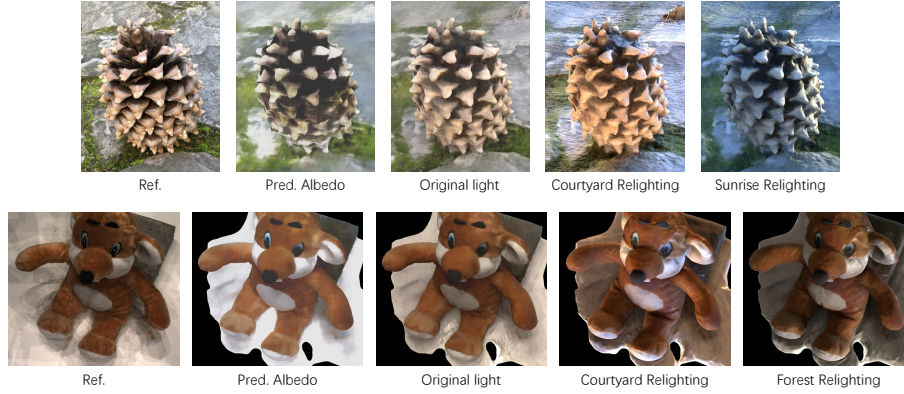

**Fig. 6. Real-World Results.** “Original light” means rendering the observed object with learned surface reflectance and learned environment illumination. We choose pinecone from NeRF [3] and scan105 from DTU MVS datasets [1].

**Table 1. Evaluation on Novel View Synthesis.** The metrics for each scene are the arithmetic mean over 8 validation views. The results of NeRF are taken from Table 4 of Nvdiffrac.

| Method            | PSNR $\uparrow$    |        |        |        |        |
|-------------------|--------------------|--------|--------|--------|--------|
|                   | Drums              | Ficus  | Hotdog | Lego   | Avg    |
| NeRF [3]          | 27.670             | 28.050 | 36.710 | 31.890 | 31.080 |
| NeuS [6]          | 24.806             | 29.211 | 36.106 | 30.652 | 30.193 |
| Nvdiffrac [4]     | 27.550             | 26.783 | 36.023 | 32.213 | 30.640 |
| NeRFactor [7]     | 27.134             | 35.090 | 34.451 | 30.799 | 31.869 |
| NeRFactor, VI [7] | 25.136             | 34.614 | 31.594 | 29.808 | 30.288 |
| Ours, VI          | 25.861             | 36.989 | 35.750 | 30.316 | 32.229 |
| Ours, LT          | 25.628             | 34.714 | 34.836 | 29.596 | 31.194 |
| Method            | SSIM $\uparrow$    |        |        |        |        |
|                   | Drums              | Ficus  | Hotdog | Lego   | Avg    |
| NeRF [3]          | 0.951              | 0.957  | 0.971  | 0.944  | 0.956  |
| NeuS [6]          | 0.932              | 0.931  | 0.976  | 0.938  | 0.944  |
| Nvdiffrac [4]     | 0.958              | 0.970  | 0.980  | 0.955  | 0.965  |
| NeRFactor [7]     | 0.950              | 0.979  | 0.945  | 0.902  | 0.944  |
| NeRFactor, VI [7] | 0.920              | 0.977  | 0.883  | 0.882  | 0.916  |
| Ours, VI          | 0.941              | 0.988  | 0.957  | 0.903  | 0.947  |
| Ours, LT          | 0.938              | 0.986  | 0.955  | 0.893  | 0.943  |
| Method            | LPIPS $\downarrow$ |        |        |        |        |
|                   | Drums              | Ficus  | Hotdog | Lego   | Avg    |
| NeRF [3]          | 0.069              | 0.055  | 0.058  | 0.075  | 0.064  |
| NeuS [6]          | 0.057              | 0.041  | 0.085  | 0.141  | 0.081  |
| Nvdiffrac [4]     | 0.054              | 0.033  | 0.040  | 0.049  | 0.044  |
| NeRFactor [7]     | 0.065              | 0.026  | 0.097  | 0.116  | 0.076  |
| NeRFactor, VI [7] | 0.081              | 0.027  | 0.162  | 0.117  | 0.097  |
| Ours, VI          | 0.066              | 0.013  | 0.063  | 0.095  | 0.059  |
| Ours, LT          | 0.066              | 0.018  | 0.070  | 0.098  | 0.063  |

**Table 2. Evaluation on Albedo.** Referring to [4], before measuring the errors, we rescaled the albedos from all tested methods to eliminate the scale ambiguity.

| Method            | Drums  | PSNR↑  |        |        |  | Avg    |
|-------------------|--------|--------|--------|--------|--|--------|
|                   |        | Ficus  | Hotdog | Lego   |  |        |
| Nvdiffrec [4]     | 20.418 | 35.452 | 27.559 | 21.393 |  | 26.205 |
| NeRFactor [7]     | 23.211 | 36.043 | 27.265 | 24.790 |  | 27.829 |
| NeRFactor, VI [7] | 23.029 | 36.101 | 26.773 | 24.844 |  | 27.686 |
| Ours, VI          | 22.704 | 36.161 | 27.069 | 24.443 |  | 27.594 |
| Ours, LT          | 22.616 | 35.440 | 26.950 | 24.179 |  | 27.296 |

  

| Method            | Drums | SSIM↑ |        |       |  | Avg   |
|-------------------|-------|-------|--------|-------|--|-------|
|                   |       | Ficus | Hotdog | Lego  |  |       |
| Nvdiffrec [4]     | 0.909 | 0.986 | 0.944  | 0.877 |  | 0.929 |
| NeRFactor [7]     | 0.935 | 0.990 | 0.928  | 0.920 |  | 0.943 |
| NeRFactor, VI [7] | 0.932 | 0.990 | 0.919  | 0.921 |  | 0.941 |
| Ours, VI          | 0.928 | 0.989 | 0.926  | 0.897 |  | 0.935 |
| Ours, LT          | 0.927 | 0.989 | 0.924  | 0.890 |  | 0.933 |

  

| Method            | Drums | LPIPS↓ |        |       |  | Avg   |
|-------------------|-------|--------|--------|-------|--|-------|
|                   |       | Ficus  | Hotdog | Lego  |  |       |
| Nvdiffrec [4]     | 0.084 | 0.015  | 0.076  | 0.138 |  | 0.078 |
| NeRFactor [7]     | 0.063 | 0.011  | 0.097  | 0.089 |  | 0.065 |
| NeRFactor, VI [7] | 0.066 | 0.011  | 0.107  | 0.096 |  | 0.070 |
| Ours, VI          | 0.070 | 0.011  | 0.093  | 0.129 |  | 0.076 |
| Ours, LT          | 0.075 | 0.011  | 0.099  | 0.134 |  | 0.080 |

**Table 3. Evaluation on Relighting.** Each listed scene includes 8 validation views, each view includes 8 HDR probe relighting images. The metrics for each scene are the arithmetic mean over 64 relighting images.

| Method            | Drums  | PSNR↑  |        |        |  | Avg    |
|-------------------|--------|--------|--------|--------|--|--------|
|                   |        | Ficus  | Hotdog | Lego   |  |        |
| Nvdiffrec [4]     | 23.112 | 28.404 | 29.029 | 21.461 |  | 25.502 |
| NeRFactor [7]     | 23.648 | 28.409 | 25.314 | 26.694 |  | 26.016 |
| NeRFactor, VI [7] | 22.558 | 28.804 | 23.109 | 25.180 |  | 24.913 |
| Ours, VI          | 22.130 | 31.144 | 25.463 | 24.776 |  | 25.878 |
| Ours, LT          | 22.986 | 28.737 | 25.665 | 24.957 |  | 25.586 |

  

| Method            | Drums | SSIM↑ |        |       |  | Avg   |
|-------------------|-------|-------|--------|-------|--|-------|
|                   |       | Ficus | Hotdog | Lego  |  |       |
| Nvdiffrec [4]     | 0.923 | 0.978 | 0.930  | 0.849 |  | 0.919 |
| NeRFactor [7]     | 0.921 | 0.953 | 0.912  | 0.873 |  | 0.915 |
| NeRFactor, VI [7] | 0.884 | 0.953 | 0.801  | 0.841 |  | 0.870 |
| Ours, VI          | 0.911 | 0.981 | 0.921  | 0.856 |  | 0.917 |
| Ours, LT          | 0.916 | 0.977 | 0.922  | 0.866 |  | 0.920 |

  

| Method            | Drums | LPIPS↓ |        |       |  | Avg   |
|-------------------|-------|--------|--------|-------|--|-------|
|                   |       | Ficus  | Hotdog | Lego  |  |       |
| Nvdiffrec [4]     | 0.070 | 0.023  | 0.086  | 0.111 |  | 0.073 |
| NeRFactor [7]     | 0.077 | 0.036  | 0.121  | 0.124 |  | 0.090 |
| NeRFactor, VI [7] | 0.095 | 0.051  | 0.203  | 0.137 |  | 0.122 |
| Ours, VI          | 0.080 | 0.018  | 0.093  | 0.111 |  | 0.075 |
| Ours, LT          | 0.077 | 0.026  | 0.100  | 0.116 |  | 0.080 |



## References

1. Jensen, R., Dahl, A., Vogiatzis, G., Tola, E., Aanæs, H.: Large scale multi-view stereopsis evaluation. In: Proceedings of the IEEE conference on computer vision and pattern recognition. pp. 406–413 (2014) [5](#), [7](#)
2. Matusik, W.: A data-driven reflectance model. Ph.D. thesis, Massachusetts Institute of Technology (2003) [3](#)
3. Mildenhall, B., Srinivasan, P.P., Tancik, M., Barron, J.T., Ramamoorthi, R., Ng, R.: Nerf: Representing scenes as neural radiance fields for view synthesis. In: European conference on computer vision. pp. 405–421. Springer (2020) [5](#), [7](#)
4. Munkberg, J., Hasselgren, J., Shen, T., Gao, J., Chen, W., Evans, A., Müller, T., Fidler, S.: Extracting triangular 3d models, materials, and lighting from images. In: Proceedings of the IEEE/CVF Conference on Computer Vision and Pattern Recognition. pp. 8280–8290 (2022) [3](#), [5](#), [6](#), [7](#), [8](#)
5. Paszke, A., Gross, S., Massa, F., Lerer, A., Bradbury, J., Chanan, G., Killeen, T., Lin, Z., Gimelshein, N., Antiga, L., Desmaison, A., Kopf, A., Yang, E., DeVito, Z., Raison, M., Tejani, A., Chilamkurthy, S., Steiner, B., Fang, L., Bai, J., Chintala, S.: Pytorch: An imperative style, high-performance deep learning library. In: Wallach, H., Larochelle, H., Beygelzimer, A., d'Alché-Buc, F., Fox, E., Garnett, R. (eds.) Advances in Neural Information Processing Systems 32, pp. 8024–8035. Curran Associates, Inc. (2019), <http://papers.neurips.cc/paper/9015-pytorch-an-imperative-style-high-performance-deep-learning-library.pdf> [3](#)
6. Wang, P., Liu, L., Liu, Y., Theobalt, C., Komura, T., Wang, W.: Neus: Learning neural implicit surfaces by volume rendering for multi-view reconstruction. Advances in Neural Information Processing Systems **34**, 27171–27183 (2021) [3](#), [7](#)
7. Zhang, X., Srinivasan, P.P., Deng, B., Debevec, P., Freeman, W.T., Barron, J.T.: Nerfactor: Neural factorization of shape and reflectance under an unknown illumination. ACM Transactions on Graphics (TOG) **40**(6), 1–18 (2021) [3](#), [7](#), [8](#)
